# Supplementary material
Source: Springer Nature journal article supplement (https://www.springermedizin.de/resource/supplementary/12913_2012_2264_MOESM1_ESM.pdf/9530110)
Supplement: MOESM1 [file 9530110]

Knowledge  
Dissemination  
workshops

On-going engagement  
and one – one  
consultations

Publications  
Conference  
presentations

Policy and Service design & delivery recommendations that will  
enhance the capabilities and practice of CMW's to meet the  
special needs of the poor and marginalized women.
